# Supplementary material for: Evolutionary dynamics of retrotransposable elements Rex1, Rex3 and Rex6 in neotropical cichlid genomes
Source: PubMed Central journal article supplement (PMC3728117; doi:10.1186/1471-2148-13-152), 2013-07-16
Supplement: 1471-2148-13-152-S2.pdf [file 1471-2148-13-152-S2.pdf]

**Additional file 2.** Kimura-corrected average pairwise distances (intersection between line and column) between aligned sequence of *Rex3* partial reverse transcriptase sequences from Cichlids and Perciformes marine species. Above diagonal, average genetic distance within species.

|                         | Cichid species      |                     |                    |                   |                  |                     |                     | Perciformes marine species |                          |                         |                            |
|-------------------------|---------------------|---------------------|--------------------|-------------------|------------------|---------------------|---------------------|----------------------------|--------------------------|-------------------------|----------------------------|
|                         | Neotropical         |                     |                    |                   |                  |                     | African             | <i>Gymnodraco</i><br>sp.   | <i>Notothenia</i><br>sp. | <i>Siniperca</i><br>sp. | <i>Cissostichus</i><br>sp. |
|                         | <i>C. monoculus</i> | <i>A. ocellatus</i> | <i>G. proximus</i> | <i>P. scalare</i> | <i>S. discus</i> | <i>C. labridens</i> | <i>O. niloticus</i> |                            |                          |                         |                            |
|                         | 6.60%               | 6.80%               | 9.00%              | 13.00%            | 4.40%            | 4.80%               | 1.80%               | 0                          | 0                        | 0                       | 0                          |
| <i>C. monoculus</i>     |                     |                     |                    |                   |                  |                     |                     |                            |                          |                         |                            |
| <i>A. ocellatus</i>     | 9.11%               |                     |                    |                   |                  |                     |                     |                            |                          |                         |                            |
| <i>G. proximus</i>      | 11.31%              | 10.57%              |                    |                   |                  |                     |                     |                            |                          |                         |                            |
| <i>P. scalare</i>       | 15.33%              | 13.39%              | 16.35%             |                   |                  |                     |                     |                            |                          |                         |                            |
| <i>S. discus</i>        | 11.56%              | 10.60%              | 12.58%             | 13.56%            |                  |                     |                     |                            |                          |                         |                            |
| <i>C. labridens</i>     | 10.83%              | 10.02%              | 12.49%             | 13.37%            | 6.96%            |                     |                     |                            |                          |                         |                            |
| <i>O. niloticus</i>     | 13.13%              | 12.54%              | 13.94%             | 18.16%            | 13.57%           | 12.59%              |                     |                            |                          |                         |                            |
| <i>Gymnodraco</i> sp.   | 31.25%              | 32.10%              | 31.60%             | 37.08%            | 31.86%           | 32.67%              | 29.39%              |                            |                          |                         |                            |
| <i>Notothenia</i> sp.   | 29.32%              | 29.76%              | 29.68%             | 34.75%            | 29.84%           | 30.61%              | 27.43%              | 2.63%                      |                          |                         |                            |
| <i>Siniperca</i> sp.    | 22.10%              | 23.29%              | 22.69%             | 27.66%            | 21.52%           | 22.32%              | 16.31%              | 29.56%                     | 27.59%                   |                         |                            |
| <i>Cissostichus</i> sp. | 30.02%              | 30.74%              | 30.15%             | 35.64%            | 30.50%           | 31.32%              | 28.10%              | 2.19%                      | 2.19%                    | 28.26%                  |                            |
